# Psychiatric Services

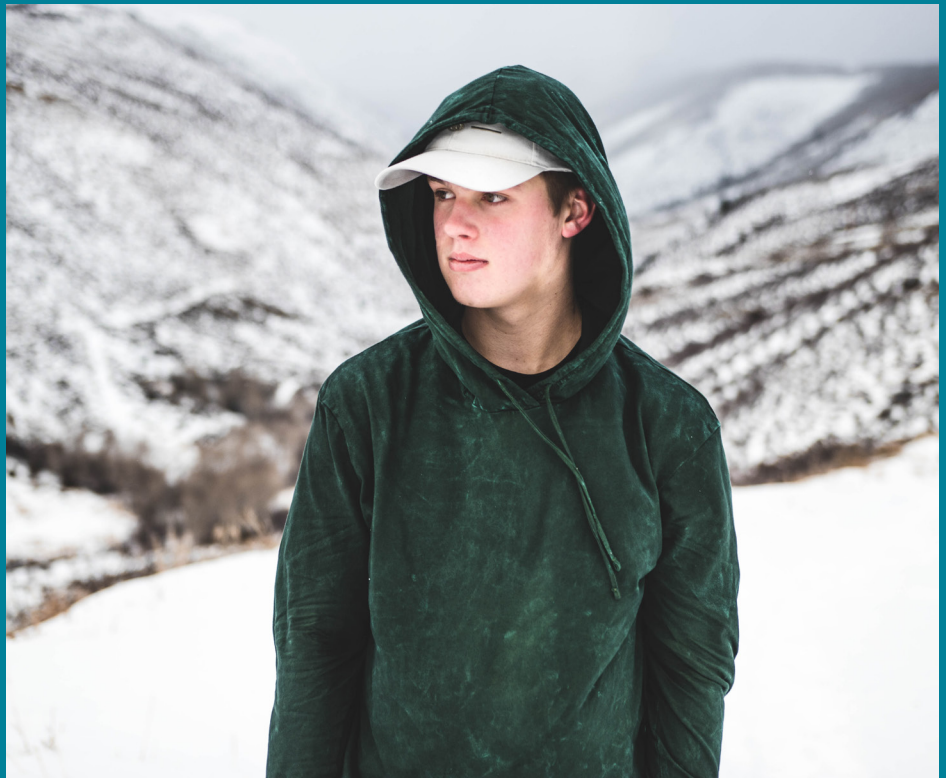

Outpatient care and follow-up for youths after psychiatric crisis

Racial disparities in decisional capacity consultations

Controversies: universal suicide screening in primary care

Street outreach with low-barrier buprenorphine treatment
