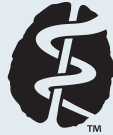

# Psychiatric Services

A Journal of the American Psychiatric Association

*Psychiatric Services*, established in 1950, is published monthly by the American Psychiatric Association for mental health professionals and others concerned with treatment and services for persons with mental illnesses and mental disabilities, in keeping with APA's objectives to improve care and treatment, to promote research and professional education in psychiatric and related fields, and to advance the standards of all psychiatric services and facilities.

## Mailing Address

*Psychiatric Services*  
American Psychiatric Association  
800 Maine Ave., S.W., Suite 900  
Washington, DC 20024  
E-mail: psjournal@psych.org

## Editorial Staff

Demarie S. Jackson  
*Managing Editor*  
Martin J. Spiering, Ph.D., E.L.S.  
*Senior Editor*  
Corey Parker  
*Senior Editor*  
Wendy Lieberman Taylor  
*Production Manager*  
Heidi A. Koch-Bubel  
*Editorial Support Services Manager*

## Interim Publisher

Patrick V. Hansard

## Editorial Director, Journals

Michael D. Roy

## American Psychiatric Association

Rebecca W. Brendel, M.D., J.D.

### President

Petros Levounis, M.D., M.A.

### President-Elect

Saul Levin, M.D., M.P.A.

*Chief Executive Officer and Medical Director*

## Editor

Lisa B. Dixon, M.D., M.P.H.

## Editorial Board

Deidre M. Anglin, Ph.D.  
Chyrell Bellamy, Ph.D., M.S.W.  
Samuel J. Dotson, M.D.  
Sidney H. Hankerson, M.D., M.B.A.  
Robert J. Hilt, M.D.  
Nev Jones, Ph.D.  
Michael A. Lindsey, Ph.D., M.S.W.  
Octavio N. Martinez, Jr., M.D., M.P.H.  
Hunter L. McQuiston, M.D.  
Jeanne Miranda, Ph.D.  
Ramin Mojtabai, M.D., Ph.D.  
Mark Olfson, M.D., M.P.H.  
David W. Oslin, M.D.  
Delbert Robinson, M.D.  
Rebecca C. Rossom, M.D., M.S.  
Jason Schiffman, Ph.D.  
Ruth S. Shim, M.D., M.P.H.  
Philip Wang, M.D., Dr.P.H.

## Contributing Editors

### Case Studies in Public-Sector Leadership

Jules M. Ranz, M.D., and Stephanie Le Melle, M.D.

### Controversies in Psychiatric Services

Matthew D. Erlich, M.D., Patrick Runnels, M.D., M.B.A., and Rachel Talley, M.D.

### Culture & Mental Health Services

Roberto Lewis-Fernández, M.D., and Jessica Isom, M.D., M.P.H.

### Datapoints

Tami L. Mark, Ph.D., and Alexander J. Cowell, Ph.D.

### Economic Grand Rounds

Steven S. Sharfstein, M.D., Haiden A. Huskamp, Ph.D., and Alison Evans Cuellar, Ph.D.

### Editor's Choice

Carrie Cunningham, M.D., M.P.H., and Nicole Kozloff, M.D.

### From Pages to Practice podcast

Josh Berezin, M.D., M.S.

### Frontline Reports

Sarah Vinson, M.D., and Stephen M. Goldfinger, M.D.

### Global Mental Health Reforms

Pamela Y. Collins, M.D., M.P.H., Matías Irrarázaval, M.D., M.P.H., Helen E. Jack, M.D., and Lola Kola, Ph.D.

### Integrated Care

Benjamin G. Druss, M.D., M.P.H., and Gail L. Daumit, M.D., M.H.S.

### Law & Psychiatry

Paul S. Appelbaum, M.D.

### Lived Experience Inclusion & Leadership

Nev Jones, Ph.D., and Keris Jän Myrick, M.B.A., M.S.

### Personal Accounts

Patricia E. Deegan, Ph.D., and William C. Torrey, M.D.

### Promoting High-Value Mental Health Care

Marcela Horvitz-Lennon, M.D., M.P.H., and Kenneth Minkoff, M.D.

### Racism & Mental Health Equity

Ruth Shim, M.D., M.P.H., Michael Mensah, M.D., M.P.H., and Lucy Ogbu-Nwobodo, M.D., M.S.

### Research, Community, & Services Partnerships

Debra A. Pinals, M.D., Enrico G. Castillo, M.D., M.S.H.P.M., and Ayorkor Gaba, Psy.D.

### Social Determinants of Mental Health

Ruth S. Shim, M.D., M.P.H., and Michael T. Compton, M.D., M.P.H.

### State Mental Health Policy

Marvin S. Swartz, M.D., and Steven Starks, M.D.

### Technology in Mental Health

Dror Ben-Zeev, Ph.D.

## Editors Emeriti

Howard H. Goldman, M.D., Ph.D.  
John A. Talbot, M.D.

## Statistical Consultant

Melanie M. Wall, Ph.D.

## Editorial Consultants

Dixon Chibanda, M.D., M.P.H.  
Shirley M. Glynn, Ph.D.  
Michelle S. Franklin, Ph.D., M.S.N.  
Judith Weissman, Ph.D., J.D.
